# Supplementary material for: Hg2+and Cd2+binding of a bioinspired hexapeptide with two cysteine units constructed as a minimalistic metal ion sensing fluorescent probe
Source: Royal Society of Chemistry journal article supplement (doi:10.1039/c9dt01141b), 2019-01-01
Supplement: c9dt01141b1.pdf [file c9dt01141b1.pdf]

Supporting information

## **Hg<sup>2+</sup> and Cd<sup>2+</sup> binding of a bioinspired hexapeptide with two cysteine units constructed as a minimalistic metal ion sensing fluorescent probe**

**Levente I. Szekeres, Sára Bálint, Gábor Galbács, Ildikó Kálomista, Tamás Kiss, Flemming H. Larsen, Lars Hemmingsen, Attila Jancsó\***

- Table S1.  $pK_a$  values for the deprotonation processes leading to the various mono and bis complexes formed in the Hg<sup>2+</sup>:DY system (with their errors in parentheses, last digit) ( $I = 0.1$  M NaClO<sub>4</sub>,  $T = 298$  K).
- Table S2. Overall formation constants ( $\log\beta$ ) of the species formed in the Hg<sup>2+</sup>:DY system calculated by using different, fixed “arbitrary”  $\log\beta$  values for the HgH<sub>2</sub>L complex and  $pK_a$  values characterizing the deprotonation processes of the various mono and bis complexes.
- Figure S1. UV absorption spectra of DY as a function of pH, in the range of pH = 1.87 to 10.89 ( $c_{DY} = 1 \times 10^{-4}$  M,  $T = 298$  K).
- Figure S2. UV absorption spectra recorded in the Hg<sup>2+</sup>:DY 0.5:1 (A) and 1:1 (B) systems as a function of pH, in the ranges of pH = 1.83 to 10.87 (A) and pH = 1.83 to 10.95 (B) ( $c_{DY} = 1 \times 10^{-4}$  M,  $T = 298$  K). Dashed and dotted lines show the spectra of the free DY at pH = 1.87 and Hg<sup>2+</sup>:DY 0.5:1 at pH = 1.83, respectively.
- Difference UV absorption spectra for the Hg<sup>2+</sup>:DY 1:1 (pH = 6.0, continuous line) and 0.5:1 (pH = 9.5, dashed line) systems calculated by subtracting the spectra of the free ligand recorded at the same pH and concentration as those of the relevant Hg<sup>2+</sup>:DY samples. The calculated difference spectra are normalized for the metal ion concentration.
- Figure S4. UV absorption spectra recorded in the Cd<sup>2+</sup>:DY 0.5:1 (A) and 1:1 (B) systems as a function of pH, in the ranges of pH = 2.00 to 11.07 (A) and pH = 2.01 to 10.97 (B) ( $c_{DY} = 5 \times 10^{-5}$  M,  $T = 298$  K).
- Figure S5. Assignment of the various <sup>1</sup>H NMR resonances of DY at pH = 5.7 (H<sub>2</sub>O:D<sub>2</sub>O = 90:10 % v/v,  $c_{DY} = 1.0 \times 10^{-3}$  M,  $T = 298$  K).
- Figure S6. Part of the <sup>1</sup>H NMR spectra of DY, recorded as a function of pH, displaying resonances of the C<sub>β</sub>H<sub>2</sub> hydrogen atoms of the Asp, Cys and Tyr residues (A) and those of the amide groups and the aromatic ring of Tyr (B) (H<sub>2</sub>O:D<sub>2</sub>O = 90:10 % v/v,  $c_{DY} = 1.0 \times 10^{-3}$  M,  $T = 298$  K).
- Figure S7. Part of the <sup>1</sup>H NMR spectra, recorded in the Hg<sup>2+</sup>:DY 0.5:1 system as a function of pH, displaying resonances of the C<sub>β</sub>H<sub>2</sub> hydrogen atoms of the Asp, Cys and Tyr residues

(A) and those of the amide groups and the aromatic ring of Tyr (B) ( $\text{H}_2\text{O}:\text{D}_2\text{O} = 90:10\%$  v/v,  $c_{\text{DY}} = 1.0 \times 10^{-3} \text{ M}$ ,  $T = 298 \text{ K}$ ).

- Figure S8. Part of the  $^1\text{H}$  NMR spectra, recorded in the  $\text{Hg}^{2+}:\text{DY}$  1:1 system as a function of pH, displaying resonances of the  $\text{C}_\beta\text{H}_2$  hydrogen atoms of the Asp, Cys and Tyr residues (A) and those of the amide groups and the aromatic ring of Tyr (B) ( $\text{H}_2\text{O}:\text{D}_2\text{O} = 90:10\%$  v/v,  $c_{\text{DY}} = 1.0 \times 10^{-3} \text{ M}$ ,  $T = 298 \text{ K}$ ).
- Figure S9. Part of the  $^1\text{H}$  NMR spectra recorded at pH = 7.0 in the  $\text{Cd}^{2+}:\text{DY}$  system as a function of the  $\text{Cd}^{2+}:\text{DY}$  ratio ( $\text{H}_2\text{O}:\text{D}_2\text{O} = 90:10\%$  v/v,  $c_{\text{DY}} = 1.0 \times 10^{-3} \text{ M}$ ,  $T = 298 \text{ K}$ ).
- Figure S10. Fluorescence titration of DY by  $\text{Cd}^{2+}$  at pH = 7.1 ( $c_{\text{DY}} = 3.0 \times 10^{-5} \text{ M}$ ,  $\lambda_{\text{EM}} = 308 \text{ nm}$ ,  $\lambda_{\text{EX}} = 278 \text{ nm}$ ). The inset represent the change of the recorded spectra as a function of increasing  $\text{Cd}^{2+}:\text{DY}$  ratio.
- Figure S11.  $\text{Hg}^{2+}$  binding to the immobilized ligand ( $\mu\text{mol}$ ) as a function of pH ( $V_{\text{sample}} = 10.0 \text{ mL}$ , containing  $n = 2.27 \mu\text{mol}$   $\text{Hg}^{2+}$ ;  $m_{\text{DY-NTG}} = 10.0 \text{ mg}$ ;  $c_{\text{Ac}/\text{NaOAc}} = 0.02 \text{ M}$  (pH = 4.0),  $c_{\text{MES}} = 0.02 \text{ M}$  (pH = 6.0)).
- Scheme S1. Proposed schematic structures for the  $\text{Hg}^{2+}:\text{DY}$  complexes.
- Scheme S2. Proposed schematic structures for the  $\text{Cd}^{2+}:\text{DY}$  complexes.

Table S1:  $pK_a$  values for the deprotonation processes leading to the various mono and bis complexes formed in the  $Hg^{2+}$ :DY system (with their errors in parentheses, last digit) ( $I = 0.1$  M  $NaClO_4$ ,  $T = 298$  K, number of data points used in the fitting = 164, fitting parameter =  $0.005\text{ cm}^3$ ). The  $\log\beta$  of the  $HgH_2L$  complex ( $\log\beta_{HgH_2L}$ ) was estimated from the stability constant determined by Iranzo et al.<sup>1</sup> for the parent mono complex ( $HgL$ ) of the terminally protected CdPPC peptide ( $\log K = 40.0$ ). We assumed the same stability constant for the  $Hg^{2+} + [H_2L]^{2-} = [HgH_2L]$  process of DY, allowing to set a value for  $\log\beta_{HgH_2L}$  according to the equation given in the footnote of the Table. Please also note that data evaluation required the fixing of this estimated formation constant.

| Species              | $pK_a^{HgH_yL_z}$ <sup>a</sup> |
|----------------------|--------------------------------|
| $HgH_2L$             | 4.1(1)                         |
| $[HgHL]^-$           | 9.6(1)                         |
| $[HgL]^{2-}$         | –                              |
| $[HgH_3L_2]^{3-}$    | 7.9(3)                         |
| $[HgH_2L_2]^{4-}$    | 10.0(2)                        |
| $[HgHL_2]^{5-}$      | 11.2(3)                        |
| $[HgL_2]^{6-}$       | –                              |
| $\log\beta_{HgH_2L}$ | 53.85 <sup>b</sup>             |

<sup>a</sup> Data refer to the following deprotonation processes:  $HgH_yL_z = HgH_{y-1}L_z + H^+$ ; <sup>b</sup> For estimating the  $\log\beta$  value of  $HgH_2L$  the following equation was used:  $\log K_{Hg(CdPPC)} = \log K_{HgH_2L} = \log\beta_{HgH_2L} - \log\beta_{[H_2L]^{2-}}$  where L stands for the fully deprotonated DY ligand.

- 1, S. Pires, J. Habjanič, M. Sezer, C. M. Soares, L. Hemmingsen and O. Iranzo, *Inorg. Chem.*, 2012, **51**, 11339–11348.

Table S2: Overall formation constants ( $\log\beta$ ) of the species formed in the  $\text{Hg}^{2+}$ :DY system calculated by using different, fixed “arbitrary”  $\log\beta$  values for the  $\text{HgH}_2\text{L}$  complex and  $\text{p}K_a$  values characterizing the deprotonation processes of the various mono and bis complexes. The first model is the same as presented in Table S1. The  $\log\beta_{\text{HgH}_2\text{L}}$  value, used in the first model, was decreased and increased by 5 log units in the calculations of models 2 and 3, respectively.  $\log\beta_{\text{HgH}_2\text{L}}$  in model 4 was set to a value that resulted in free  $\text{Hg}^{2+}$  ions appearing in a notable amount (ca. 0.16 mole fraction  $[\text{Hg}^{2+}]_{\text{free}}$ ) at  $\text{pH} = 2.0$  and 1:1  $\text{Hg}^{2+}$ :DY ratio.

|                                 | 1                  |                                  | 2                  |                                  | 3                  |                                  | 4                  |                                  |
|---------------------------------|--------------------|----------------------------------|--------------------|----------------------------------|--------------------|----------------------------------|--------------------|----------------------------------|
| Species                         | $\log\beta$        | $\text{p}K_a^{\text{HgHyLz } a}$ |
| $\text{HgH}_2\text{L}$          | 53.85 <sup>b</sup> | 4.1                              | 48.85 <sup>b</sup> | 4.1                              | 58.85 <sup>b</sup> | 4.1                              | 31.85 <sup>b</sup> | 4.1                              |
| $[\text{HgHL}]^-$               | 49.7(1)            | 9.6                              | 44.7(1)            | 9.6                              | 54.7(1)            | 9.6                              | 27.8(1)            | 9.6                              |
| $[\text{HgL}]^{2-}$             | 40.1(1)            | –                                | 35.1(1)            | –                                | 45.1(1)            | –                                | 18.2(1)            | –                                |
| $[\text{HgH}_3\text{L}_2]^{3-}$ | 72.7(3)            | 7.9                              | 67.7(3)            | 7.9                              | 77.7(3)            | 7.9                              | 50.7(2)            | 7.8                              |
| $[\text{HgH}_2\text{L}_2]^{4-}$ | 64.8(2)            | 10.0                             | 59.8(2)            | 10.0                             | 69.8(2)            | 10.0                             | 42.9(1)            | 10.0                             |
| $[\text{HgHL}_2]^{5-}$          | 54.8(1)            | 11.2                             | 49.8(1)            | 11.2                             | 59.8(1)            | 11.2                             | 32.9(1)            | 11.2                             |
| $[\text{HgL}_2]^{6-}$           | 43.6(3)            | –                                | 38.6(3)            | –                                | 48.6(3)            | –                                | 21.7(2)            | –                                |

<sup>a</sup> Data refer to the following deprotonation processes:  $\text{HgH}_y\text{L}_z = \text{HgH}_{y-1}\text{L}_z + \text{H}^+$ ; <sup>b</sup> For estimating the  $\log\beta$  value of  $\text{HgH}_2\text{L}$  the following equation was used:  $\log K_{\text{Hg}(\text{CdPPC})} = \log K_{\text{HgH}_2\text{L}} = \log\beta_{\text{HgH}_2\text{L}} - \log\beta_{[\text{H}_2\text{L}]^{2-}}$  where L stands for the fully deprotonated DY ligand – see the reference for  $\log K_{\text{Hg}(\text{CdPPC})}$  under Table S1.

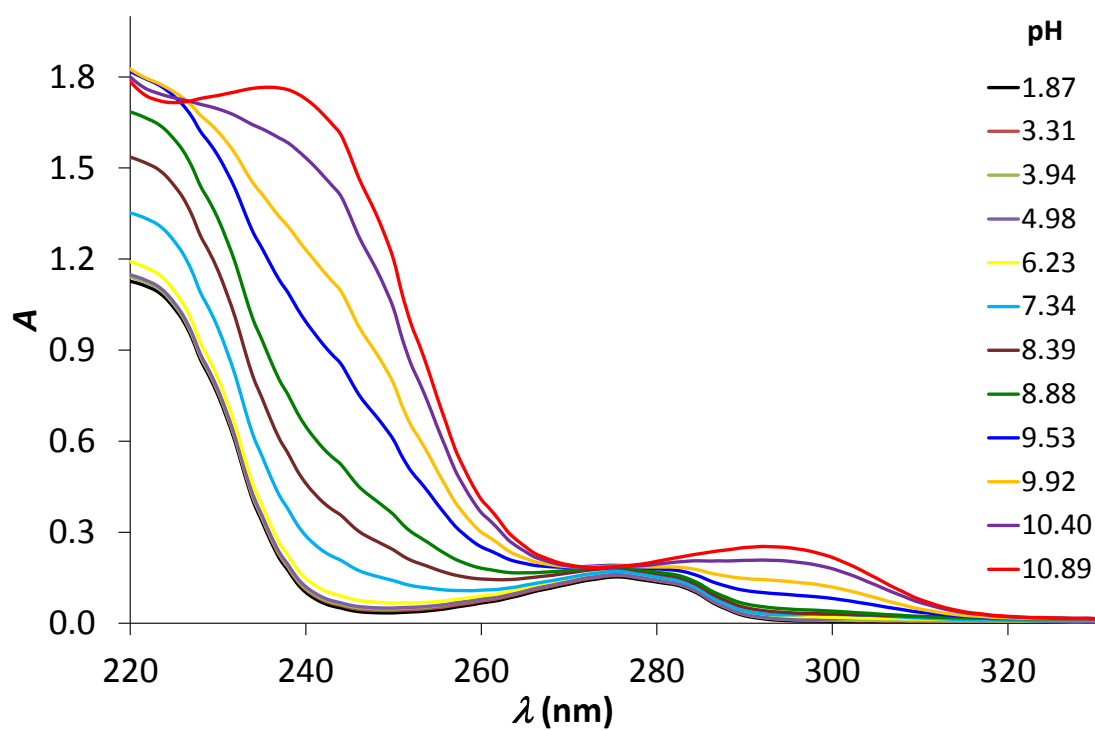

Figure S1. UV absorption spectra of DY as a function of pH, in the range of pH = 1.87 to 10.89 ( $c_{\text{DY}} = 1 \times 10^{-4}$  M,  $T = 298$  K).

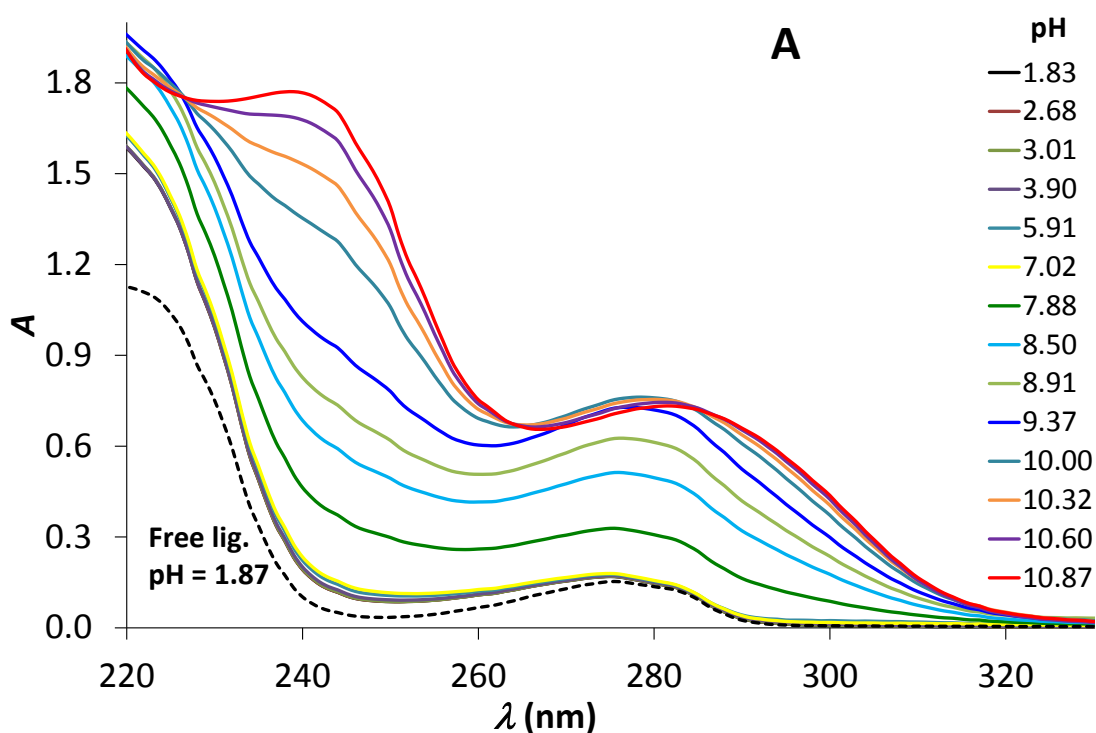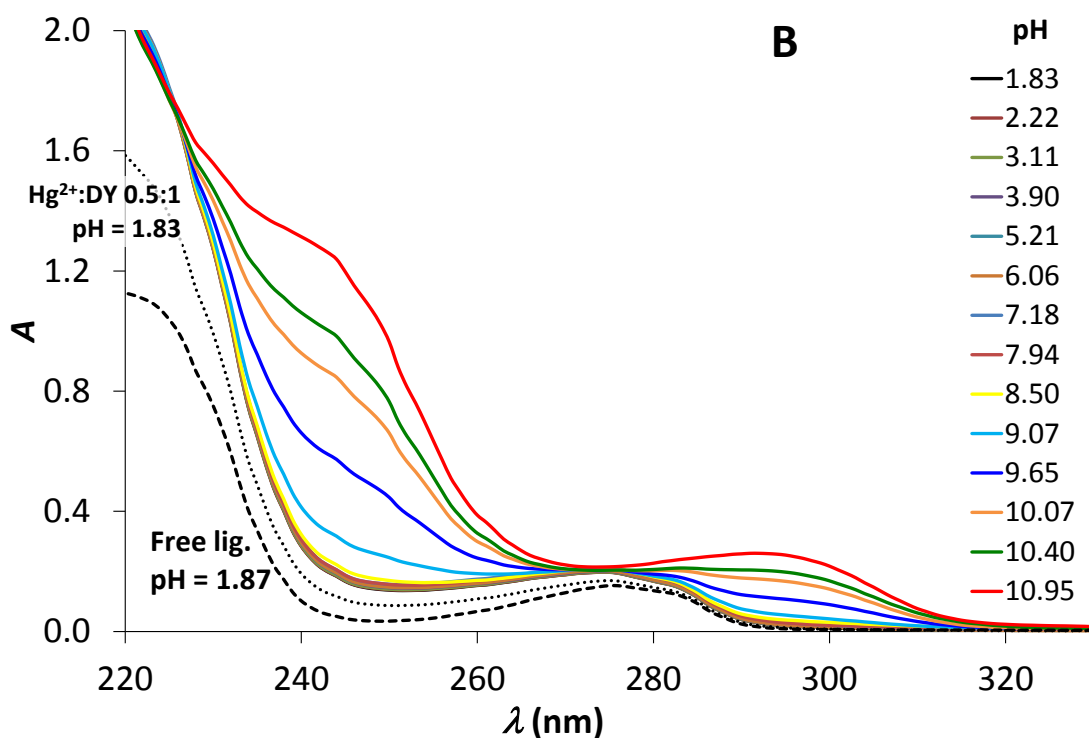

Figure S2. UV absorption spectra recorded in the  $\text{Hg}^{2+}:\text{DY}$  0.5:1 (A) and 1:1 (B) systems as a function of pH, in the ranges of pH = 1.83 to 10.87 (A) and pH = 1.83 to 10.95 (B) ( $c_{\text{DY}} = 1 \times 10^{-4}$  M,  $T = 298$  K). Dashed and dotted lines show the spectra of the free DY at pH = 1.87 and  $\text{Hg}^{2+}:\text{DY}$  0.5:1 at pH = 1.83, respectively.

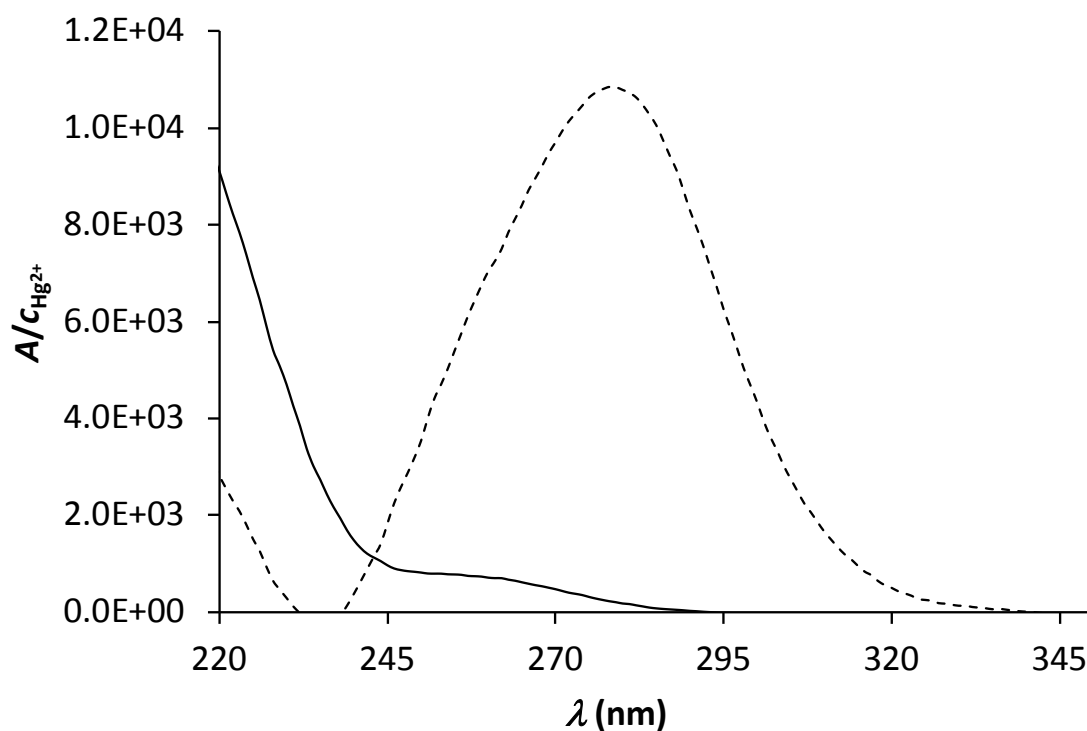

Figure S3. Difference UV absorption spectra for the Hg<sup>2+</sup>:DY 1:1 (pH = 6.0, continuous line) and 0.5:1 (pH = 9.5, dashed line) systems calculated by subtracting the spectra of the free ligand recorded at the same pH and concentration as those of the relevant Hg<sup>2+</sup>:DY samples. The calculated difference spectra are normalized for the metal ion concentration.

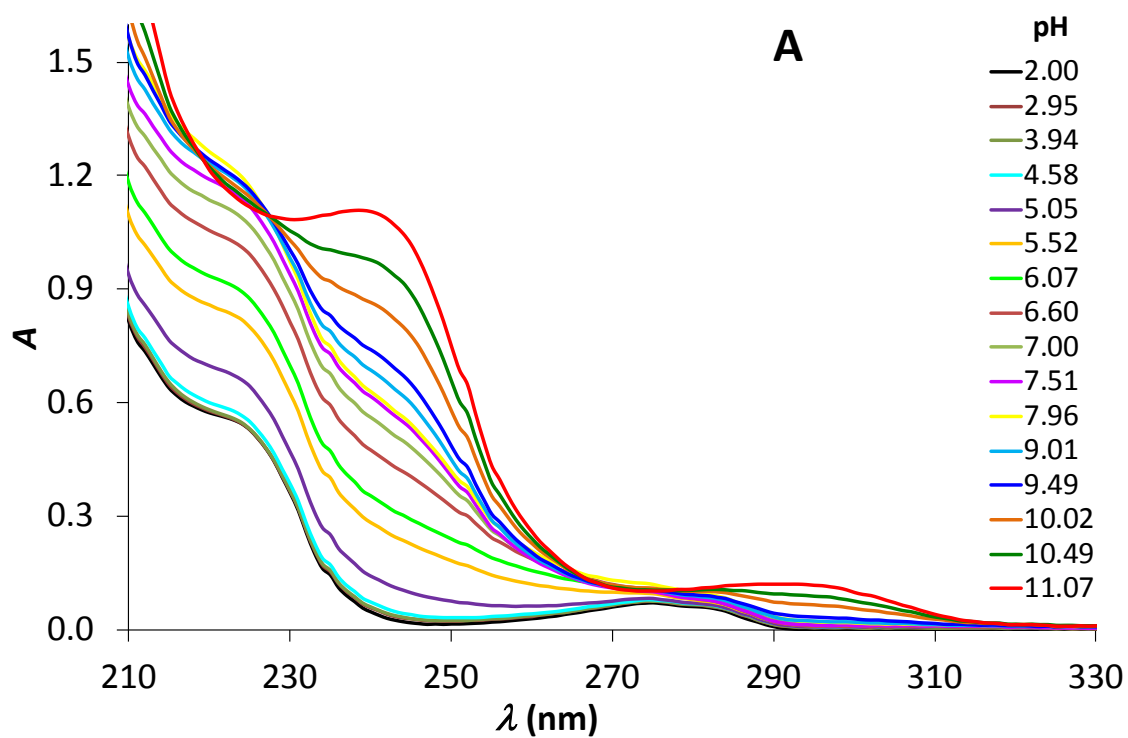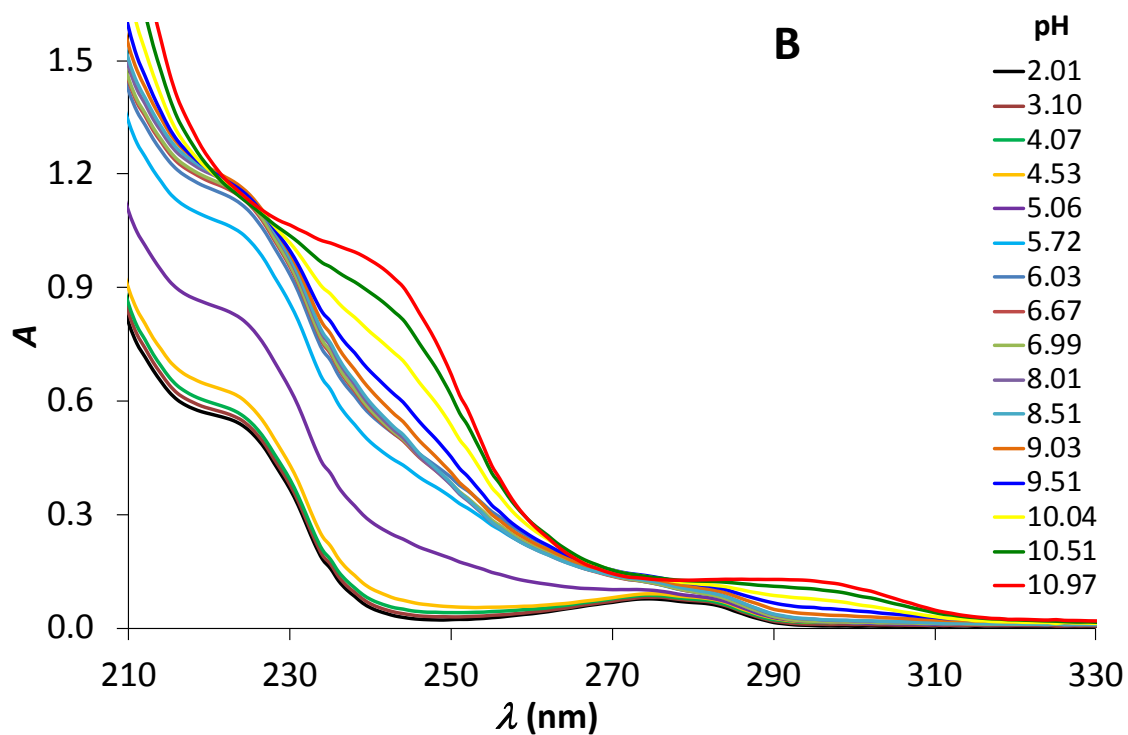

Figure S4. UV absorption spectra recorded in the  $\text{Cd}^{2+}$ :DY 0.5:1 (A) and 1:1 (B) systems as a function of pH, in the ranges of pH = 2.00 to 11.07 (A) and pH = 2.01 to 10.97 (B) ( $c_{\text{DY}} = 5 \times 10^{-5}$  M,  $T = 298$  K).

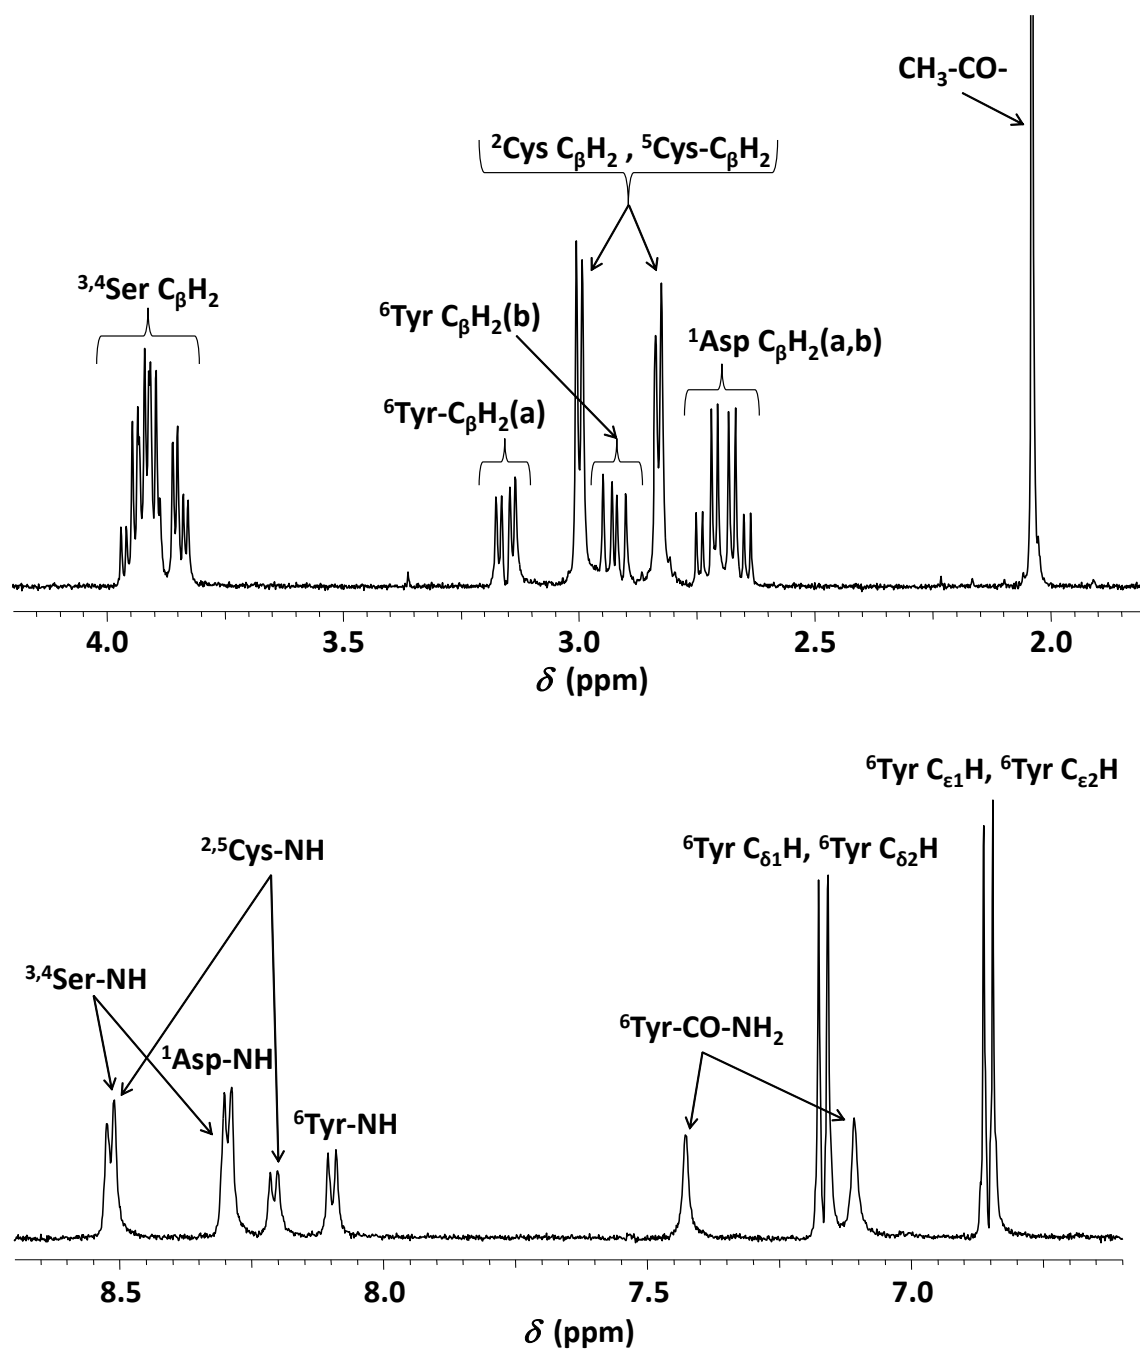

Figure S5. Assignment of the various  $^1\text{H}$  NMR resonances of DY at pH = 5.7 ( $\text{H}_2\text{O}:\text{D}_2\text{O} = 90:10$  % v/v,  $c_{\text{DY}} = 1.0 \times 10^{-3}$  M,  $T = 298$  K).

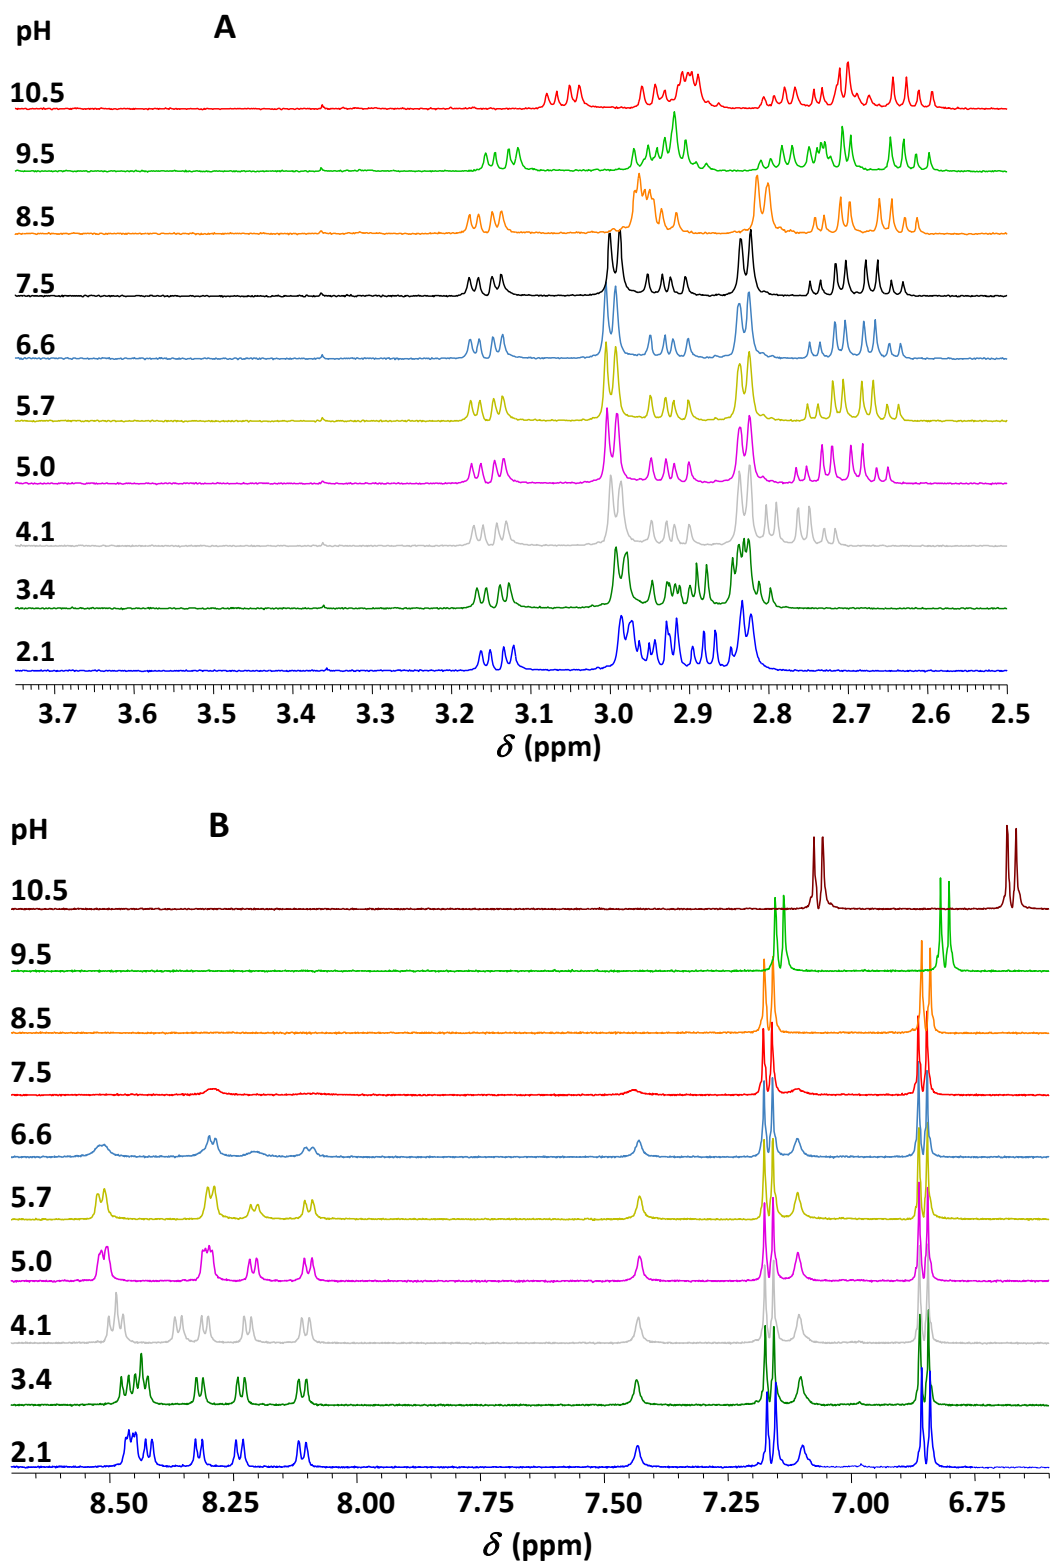

Figure S6. Part of the  $^1\text{H}$  NMR spectra of DY, recorded as a function of pH, displaying resonances of the  $\text{C}_\beta\text{H}_2$  hydrogen atoms of the Asp, Cys and Tyr residues (A) and those of the amide groups and the aromatic ring of Tyr (B) ( $\text{H}_2\text{O}:\text{D}_2\text{O} = 90:10$  % v/v,  $c_{\text{DY}} = 1.0 \times 10^{-3}$  M,  $T = 298$  K).

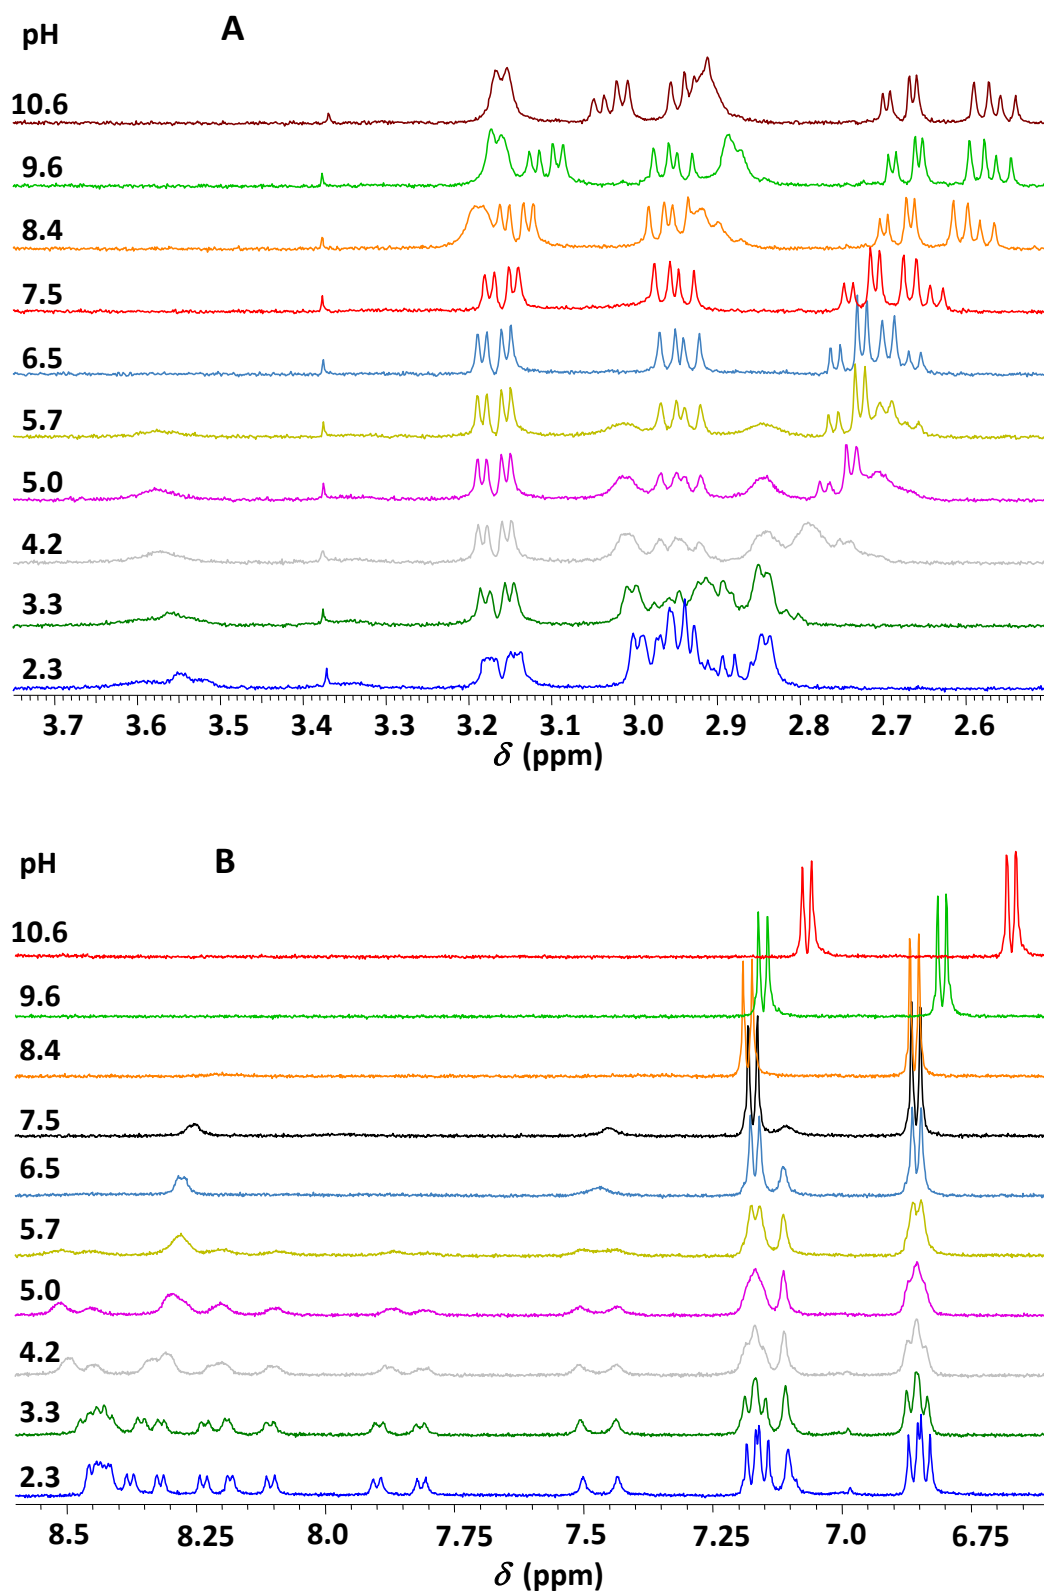

Figure S7. Part of the  $^1\text{H}$  NMR spectra, recorded in the  $\text{Hg}^{2+}:\text{DY}$  0.5:1 system as a function of pH, displaying resonances of the  $\text{C}_\beta\text{H}_2$  hydrogen atoms of the Asp, Cys and Tyr residues (A) and those of the amide groups and the aromatic ring of Tyr (B) ( $\text{H}_2\text{O}:\text{D}_2\text{O}$  = 90:10 % v/v,  $c_{\text{DY}} = 1.0 \times 10^{-3}$  M,  $T = 298$  K).

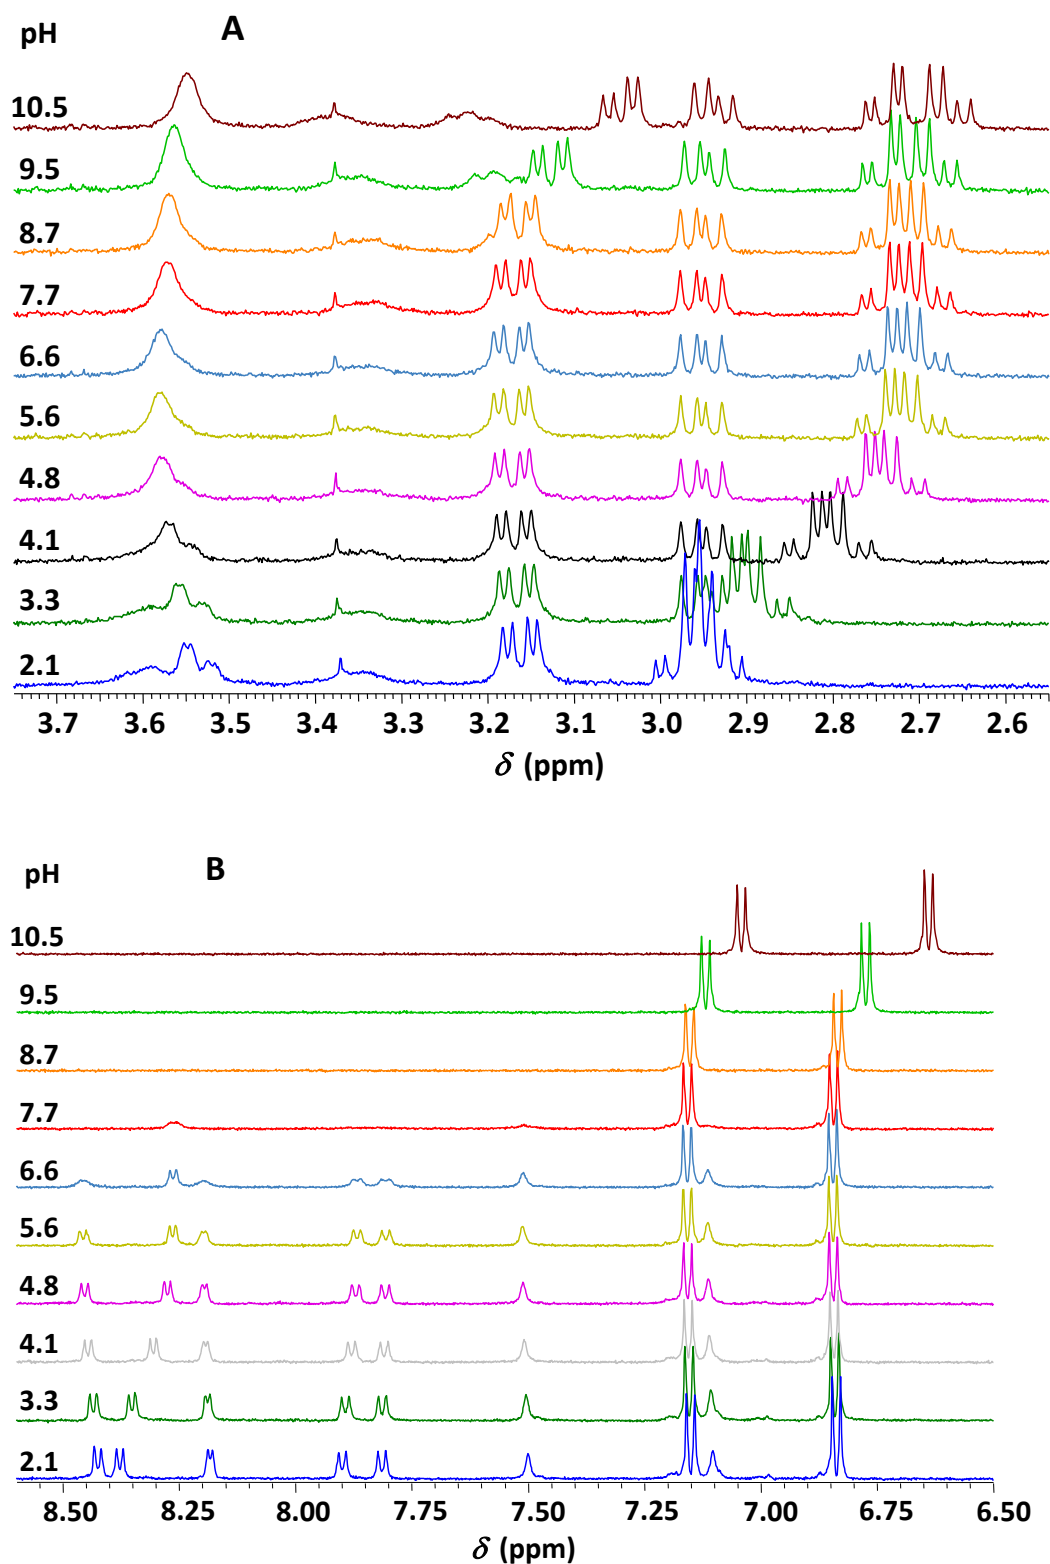

Figure S8. Part of the  $^1\text{H}$  NMR spectra, recorded in the  $\text{Hg}^{2+}:\text{DY}$  1:1 system as a function of pH, displaying resonances of the  $\text{C}_\beta\text{H}_2$  hydrogen atoms of the Asp, Cys and Tyr residues (A) and those of the amide groups and the aromatic ring of Tyr (B) ( $\text{H}_2\text{O}:\text{D}_2\text{O} = 90:10$  % v/v,  $c_{\text{DY}} = 1.0 \times 10^{-3}$  M,  $T = 298$  K).

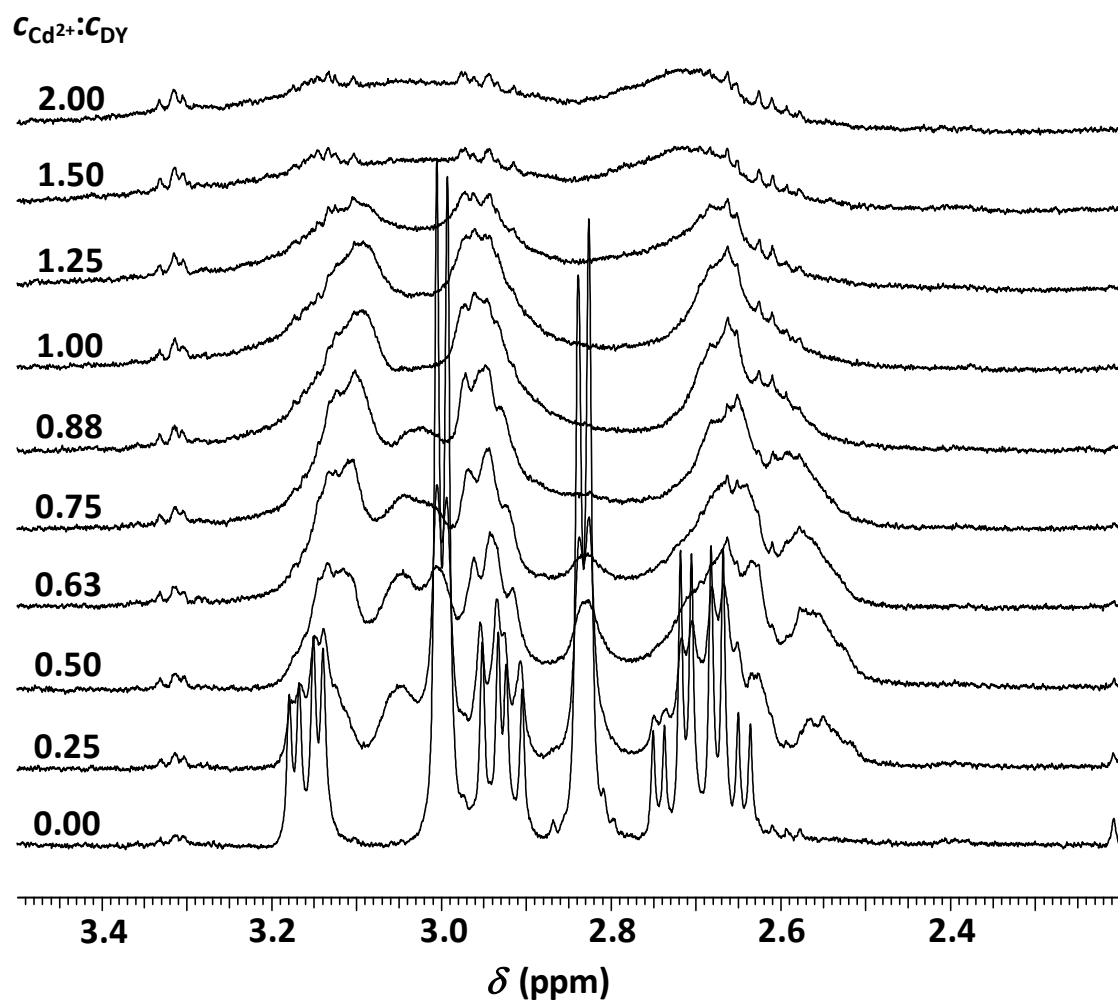

Figure S9. Part of the  $^1\text{H}$  NMR spectra recorded at  $\text{pH} = 7.0$  in the  $\text{Cd}^{2+}:\text{DY}$  system as a function of the  $\text{Cd}^{2+}:\text{DY}$  ratio ( $\text{H}_2\text{O}:\text{D}_2\text{O} = 90:10$  % v/v,  $c_{\text{DY}} = 1.0 \times 10^{-3}$  M,  $T = 298$  K).

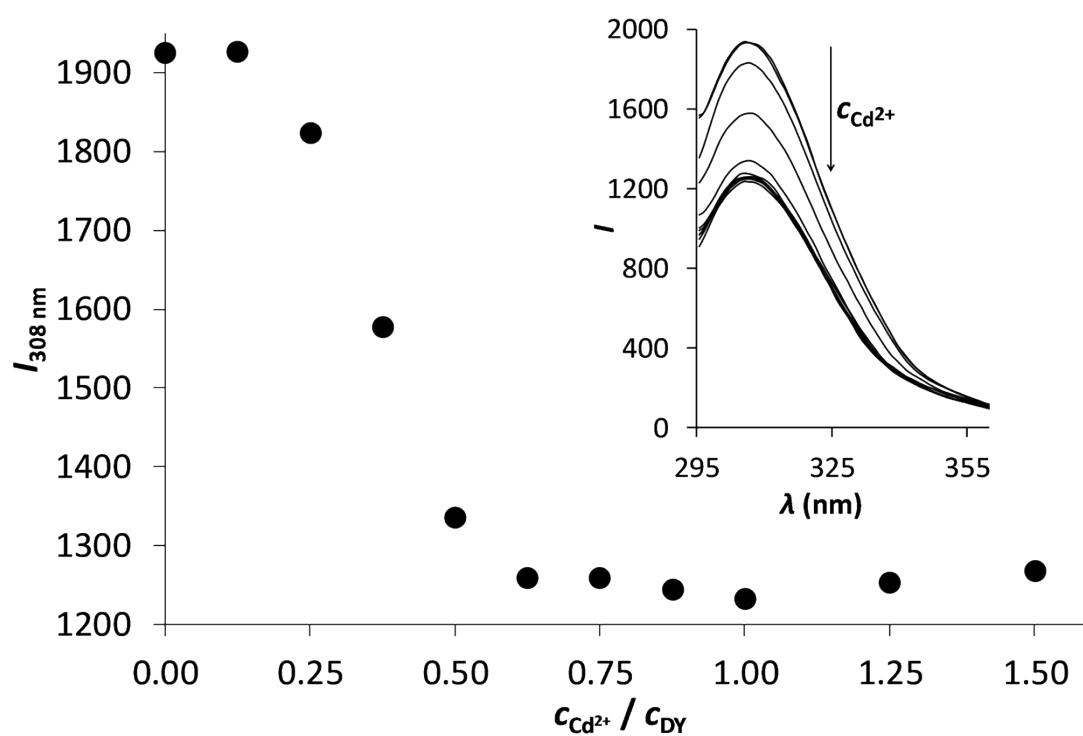

Figure S10. Fluorescence titration of DY by  $\text{Cd}^{2+}$  at  $\text{pH} = 7.1$  ( $c_{\text{DY}} = 3.0 \times 10^{-5} \text{ M}$ ,  $\lambda_{\text{EM}} = 308 \text{ nm}$ ,  $\lambda_{\text{EX}} = 278 \text{ nm}$ ). The inset shows the change of the recorded spectra as a function of increasing  $\text{Cd}^{2+}$ :DY ratio.

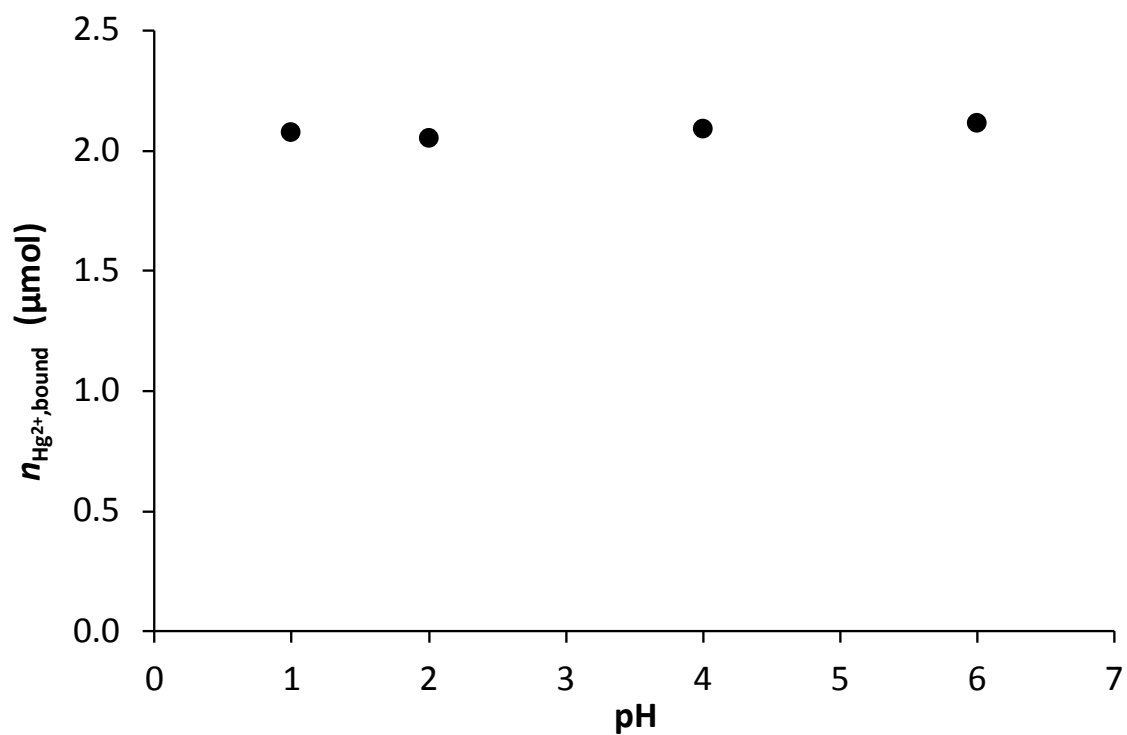

Figure S11.  $\text{Hg}^{2+}$  binding to the immobilized ligand ( $\mu\text{mol}$ ) as a function of pH ( $V_{\text{sample}} = 10.0$  mL, containing  $n = 2.2 \mu\text{mol}$   $\text{Hg}^{2+}$ ;  $m_{\text{DY-NTG}} = 10.0$  mg;  $c_{\text{AcOH/NaOAc}} = 0.02$  M (pH = 4.0),  $c_{\text{MES}} = 0.02$  M (pH = 6.0)).

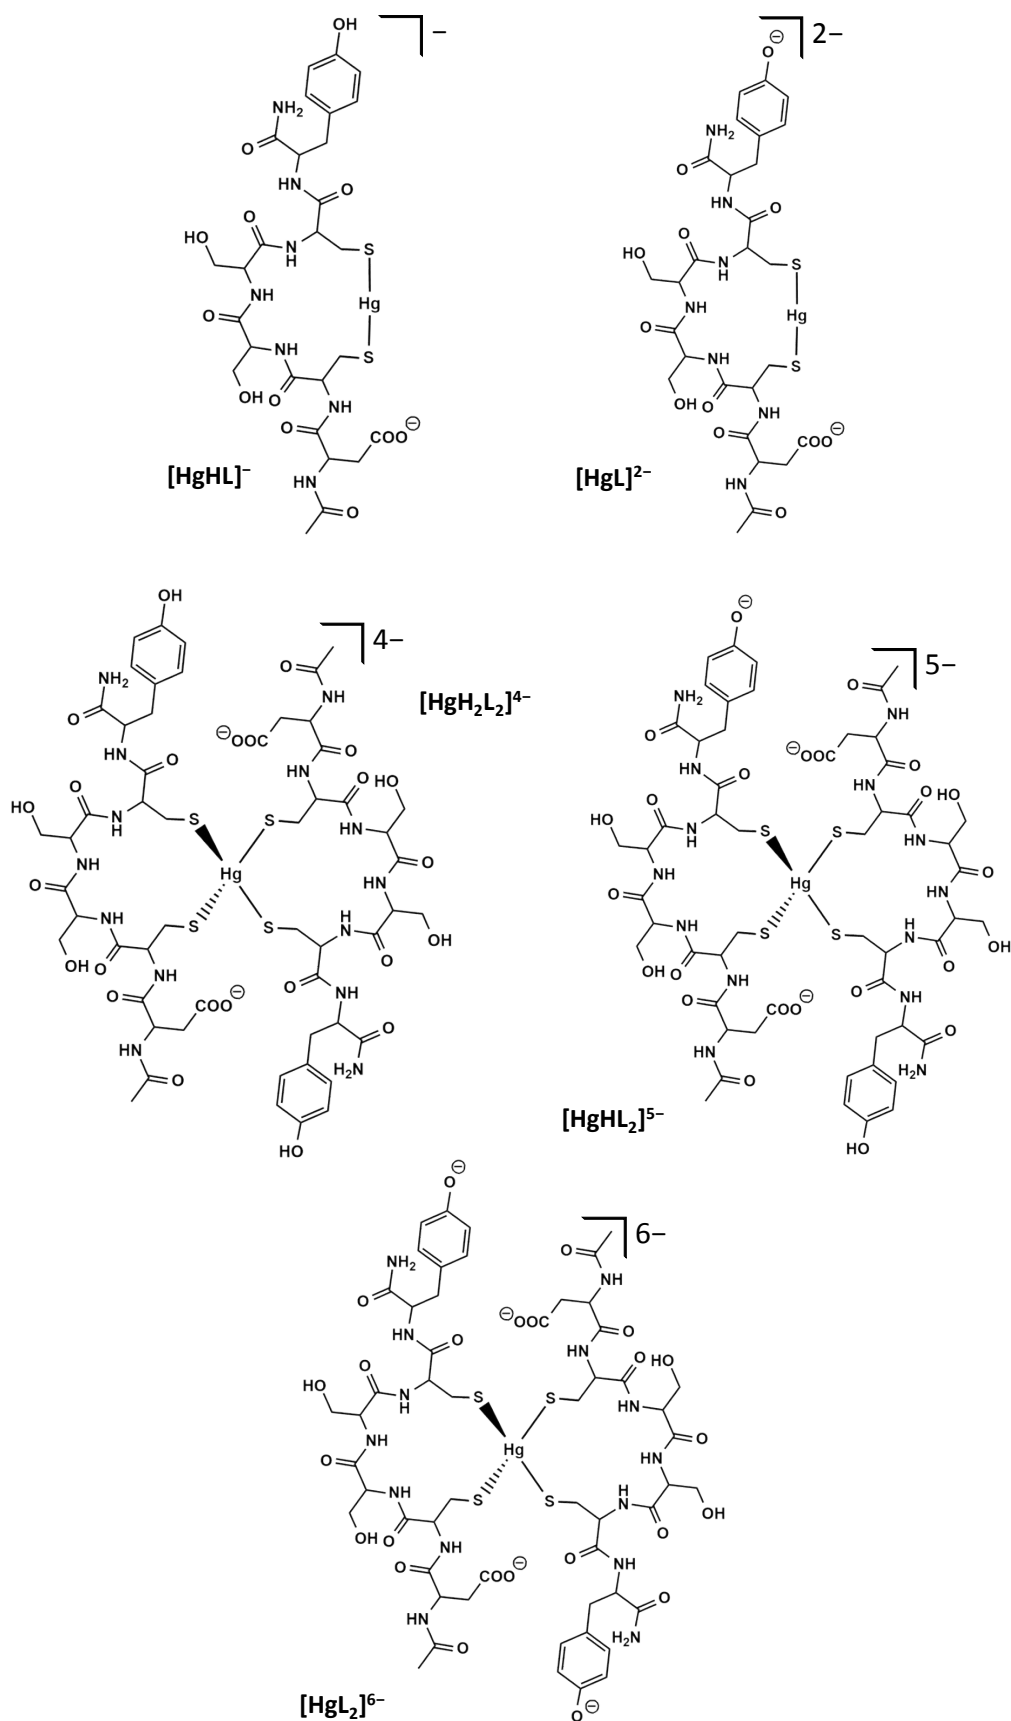

Scheme S1. Proposed schematic structures for the  $Hg^{2+}$ :DY complexes.

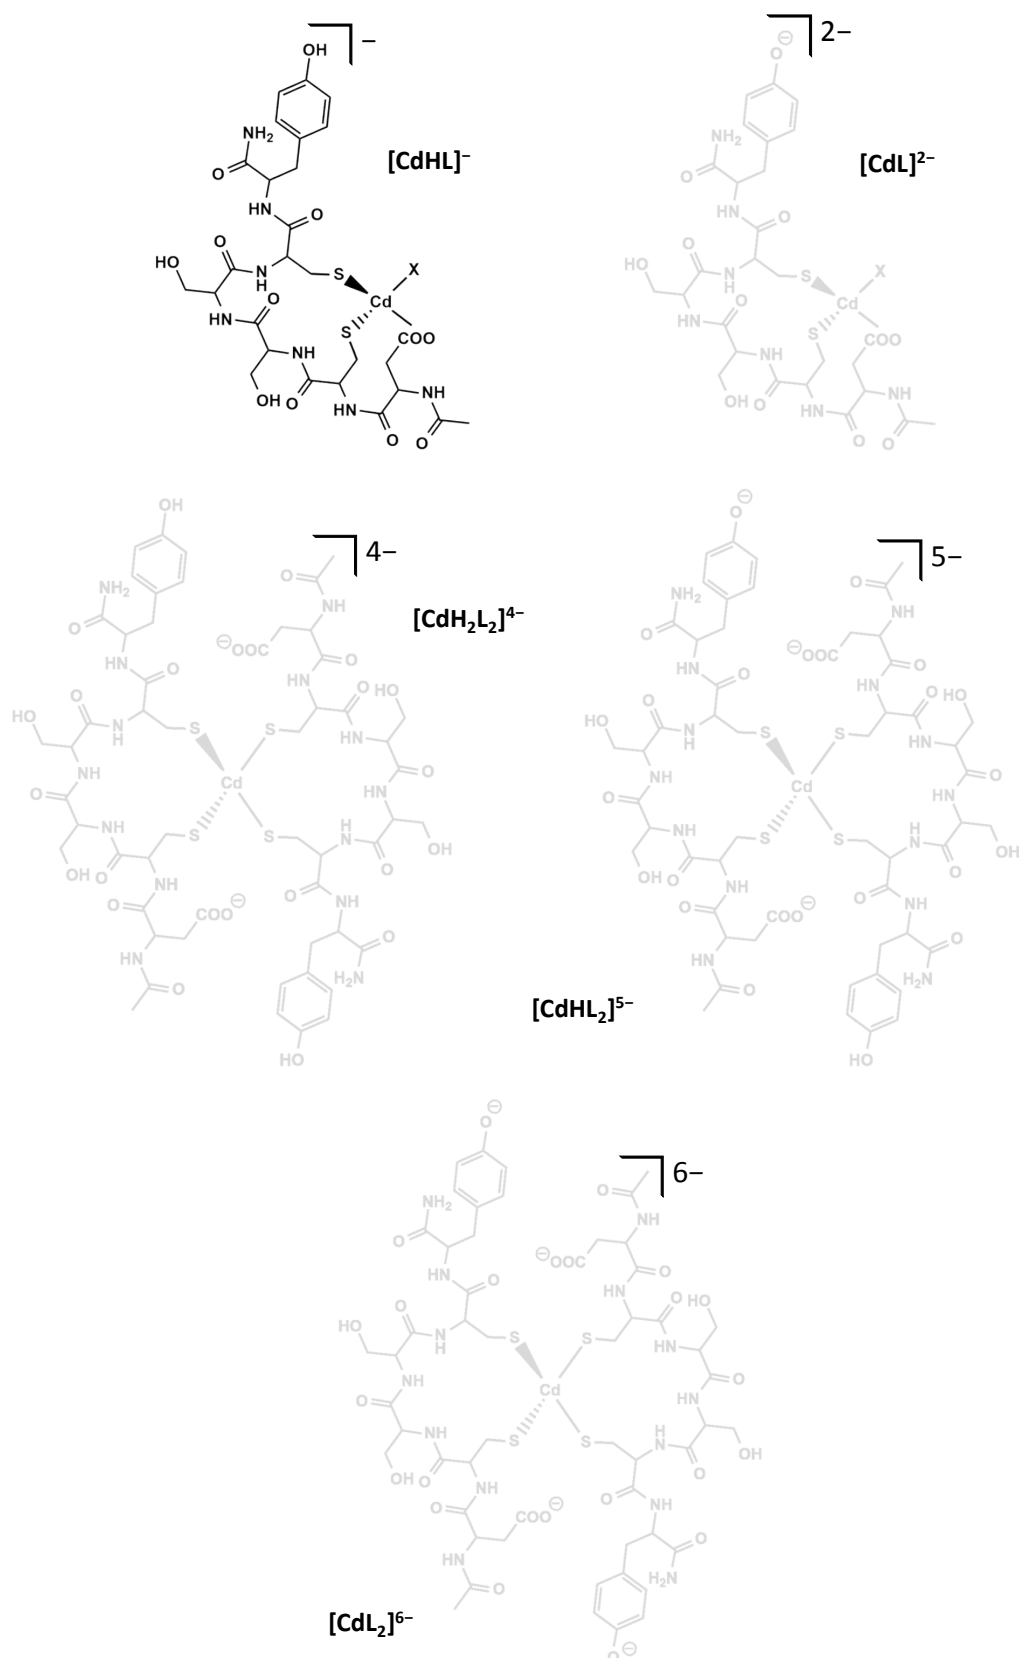

Scheme S2. Proposed schematic structures for the  $\text{Cd}^{2+}:\text{DY}$  complexes. X stands for an oxygen donor from either a  $\text{H}_2\text{O}$  molecule or a possibly coordinating amide carbonyl moiety.
